# Supplementary material for: Solid-state emissive O-BODIPY dyes with bimodal emissions across red and near infrared region
Source: Royal Society of Chemistry journal article supplement (doi:10.1039/c8ra10296a), 2019-01-01
Supplement: c8ra10296a1.pdf [file c8ra10296a1.pdf]

Electronic supplementary information

## Solid-State Emissive O-BODIPY Dyes with Bimodal Emissions across red and near infrared region

H. A. Abdulhadi El-Ali<sup>ab</sup>, Jing Jing<sup>a</sup> and Xiaoling Zhang<sup>a</sup>

<sup>a</sup>Key Laboratory of Cluster Science of Ministry of Education, Beijing Key Laboratory of Photo-electronic/Electro- photonic Conversion Materials, School of Chemistry and Chemical Engineering, Beijing Institute of Technology, Beijing 100081, P. R. China.

<sup>b</sup>College of Agriculture, Al-Muthanna University, Samawah, Al-Muthanna province, Iraq.

haiderchemist50@gmail.com , E-mail: zhangxl@bit.edu.cn,

Synthetic procedure for 4,4-Difluoro-1,3,5,7,8-pentamethyl-2,6-diethyl-4-bora-3a,4a-diaza-s-indacene. 1

A solution of acetyl chloride (5.39 mL, 75.76 mmol) was added drop-wise to a stirred solution of 3-ethyl-2,4-dimethylpyrrole (4.381 mL, 32.48 mmol) in dry dichloromethane (20 mL), over a period of 15 mints. The reaction mixture was heated (40 C, 1hour), cooled to room temperature, diluted with petroleum ether (232 mL), and triturated for 12 hours. The solvent was evaporated under reduced pressure, the residue was suspended in dry toluene (400 mL), followed by addition of dry triethylamine (8.539 mL, 63.91 mmol).

The mixture was stirred for 15 minutes and boron trifluoride etherate (10.88 mL, 88.8 mmol) was added drop-wise with stirring as a green fluorescence developed. The reaction mixture was heated (50C, 60 minutes), cooled to 40 C, washed with water (3 x 100mL), and dried (sodium anhydrous sulfate). The solvent was removed under reduced pressure to give the crude products as a dark brown solid. The crude material was purified by chromatography (silica gel) (DCM/ n-Hexane 1;1) to give the pure product as an orange solid (4 g, 77.45 %). <sup>1</sup>H NMR δ<sub>H</sub>(400 MHz, CDCl<sub>3</sub>) 2.56 (s, 3H), 2.45 (s, 6H), 2.35 (q, J = 7.5, 4H), 2.29 (s, 6H), 1.00 (t, J = 7.5, 6H) <sup>13</sup>C NMR ; δ<sub>C</sub> (125 MHz, CDCl<sub>3</sub>) 152.0, 139.9, 136.5, 132.6, 131.9, 17.4, 17.2, 15.1, 14.6, 12.61; <sup>11</sup>B NMR δ<sub>B</sub> (160 MHz, CDCl<sub>3</sub>) 0.46 (t, J = 32); MS: *m/z* calcd for [C<sub>18</sub>H<sub>25</sub>BF<sub>2</sub>N<sub>2</sub>]<sup>+</sup>: 318.22; found: 318.30, [M]<sup>+</sup>.

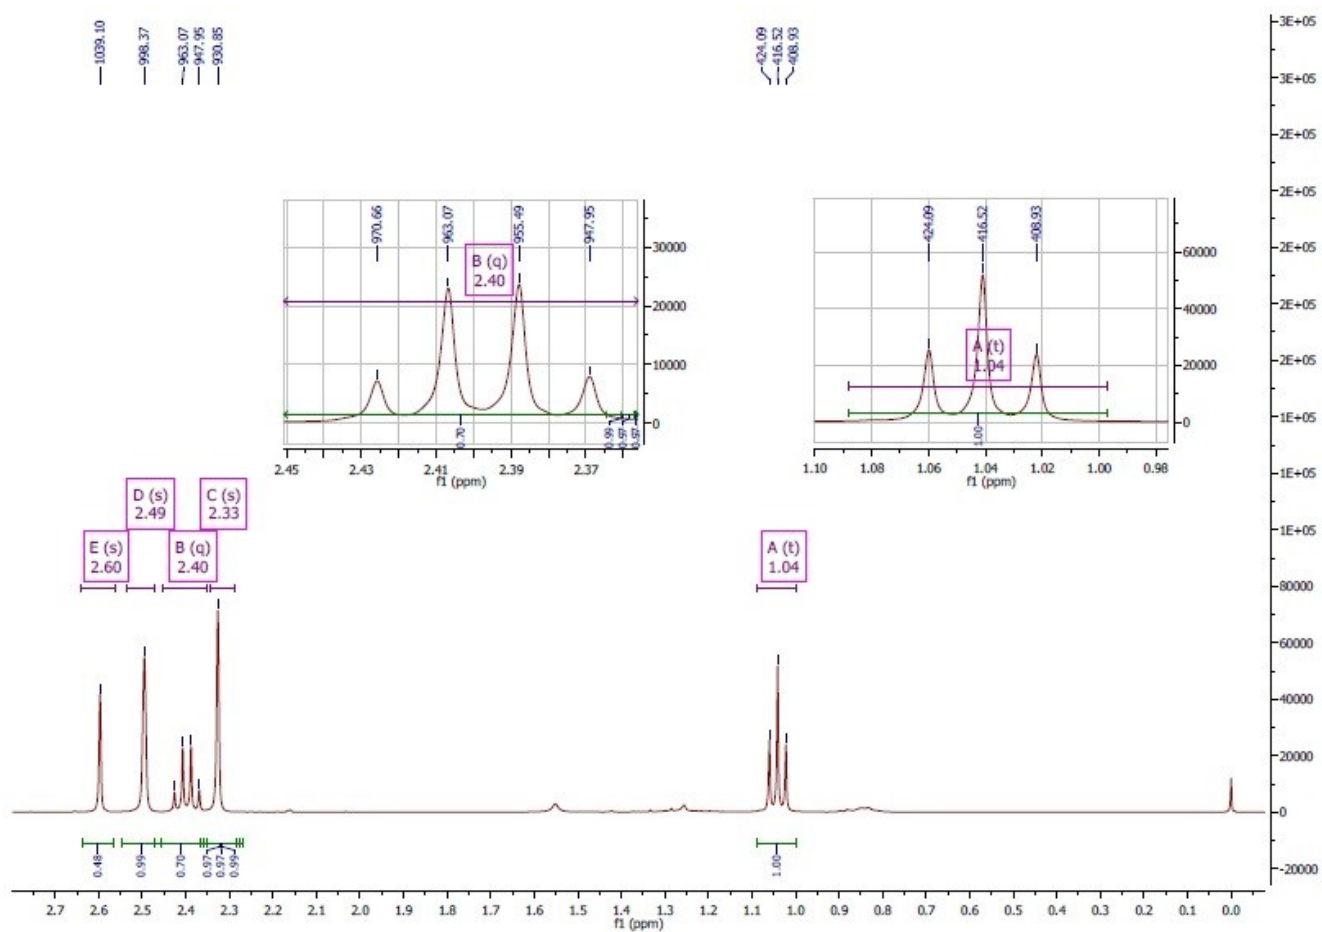

Figure S-1.  $^1\text{H-NMR}$  of compound 1 in  $\text{CDCl}_3$

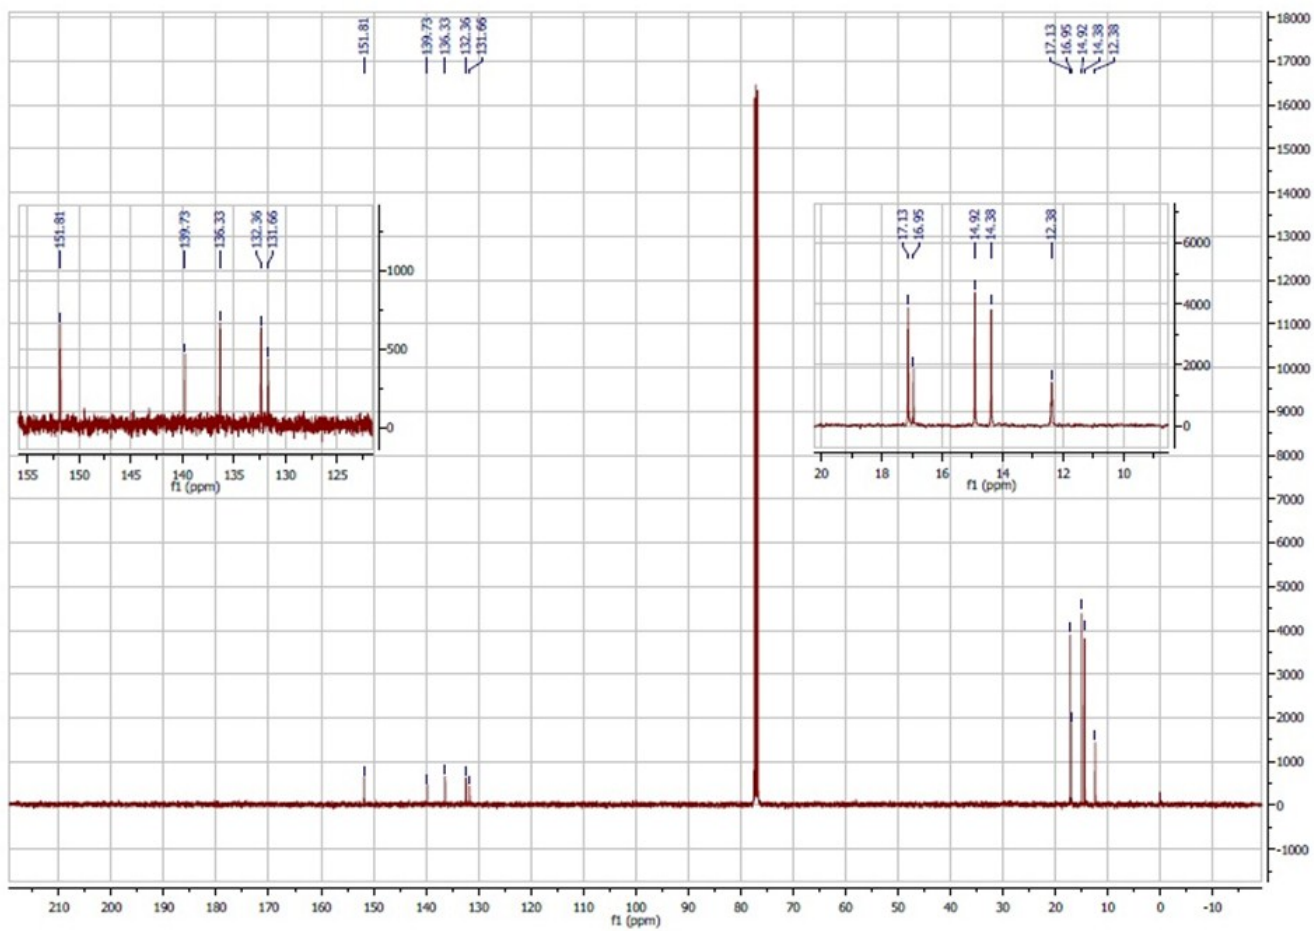

Figure S-2.  $^{13}\text{C}$ -NMR of compound 1 in  $\text{CDCl}_3$

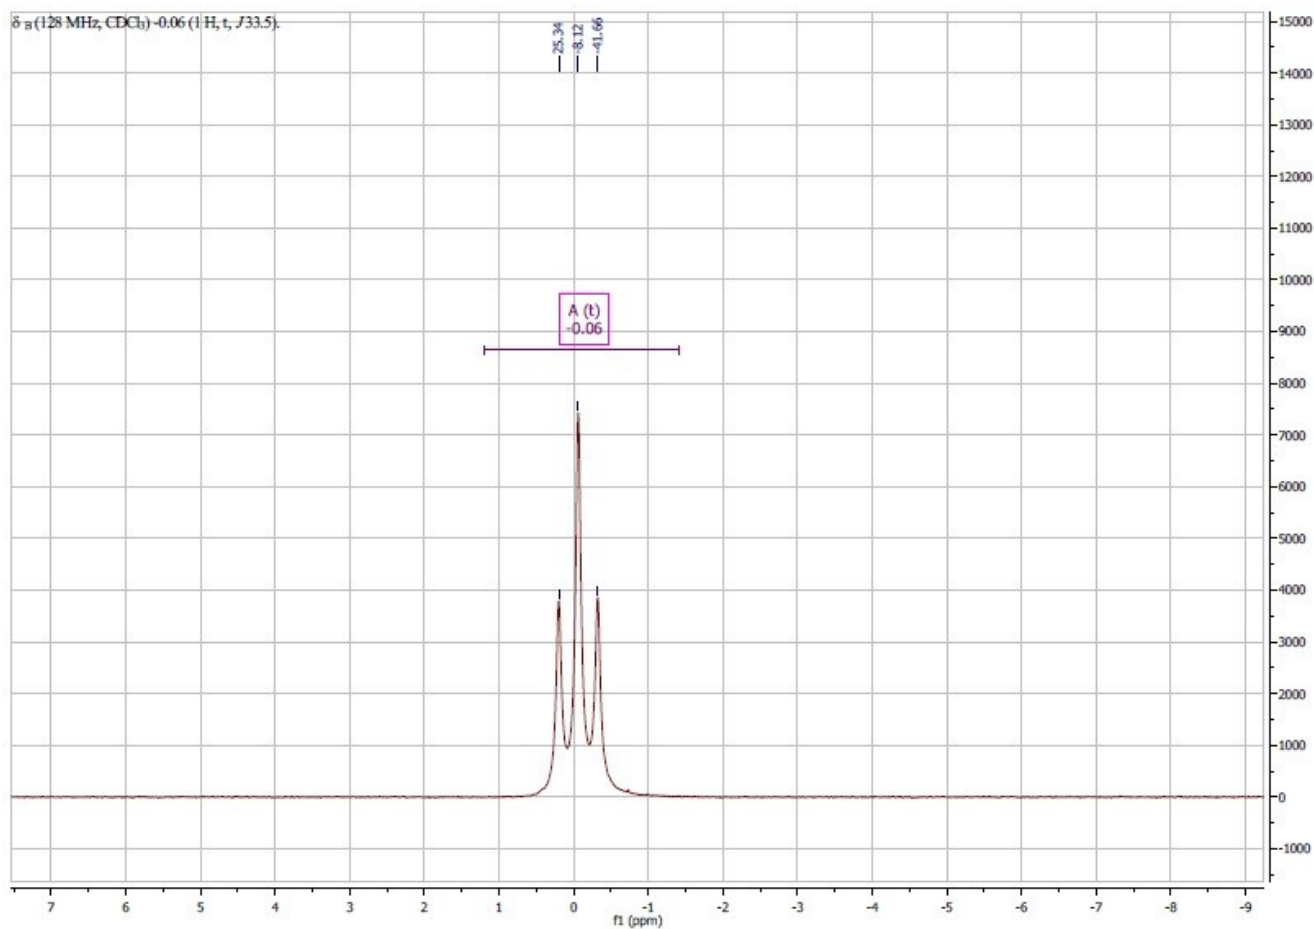

Figure S-3.  $^{11}B$ -NMR of compound 1 in  $CDCl_3$ .

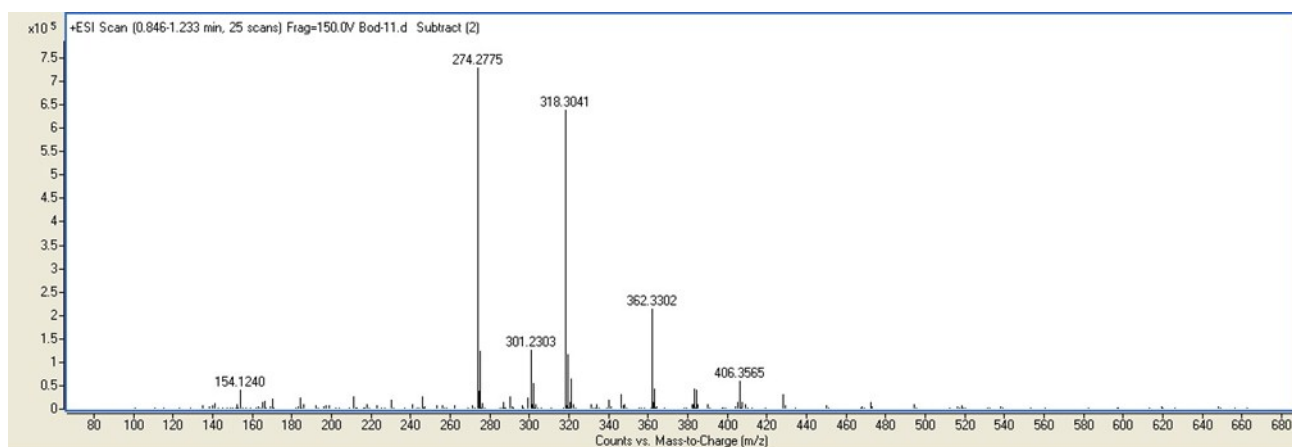

Figure S-4. HRMS spectrum of compound 1

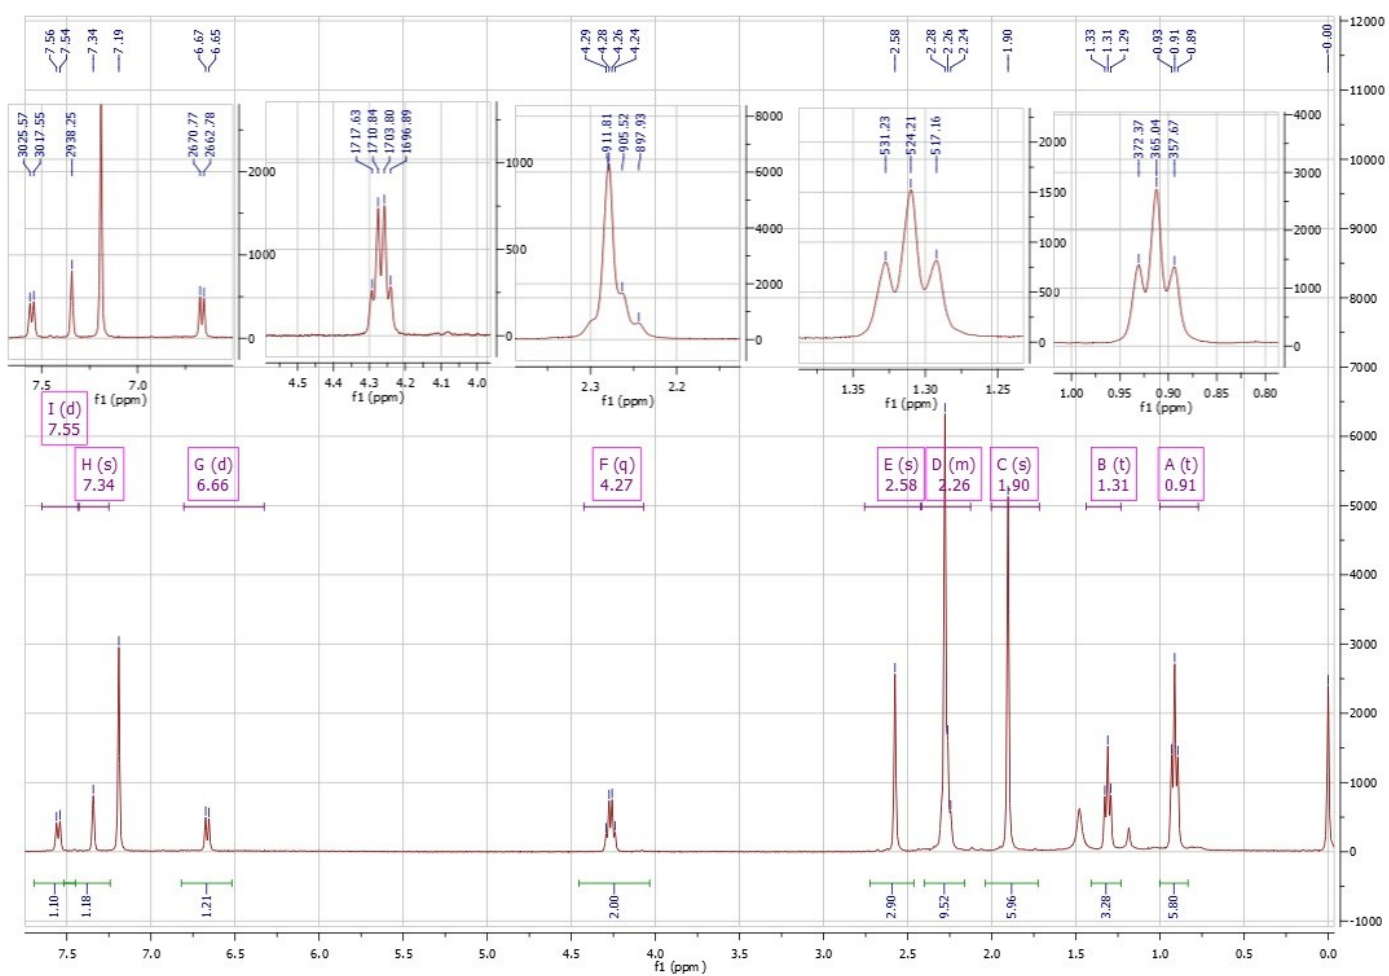

Figure S-5.  $^1\text{H-NMR}$  of compound 2a in  $\text{CDCl}_3$ .

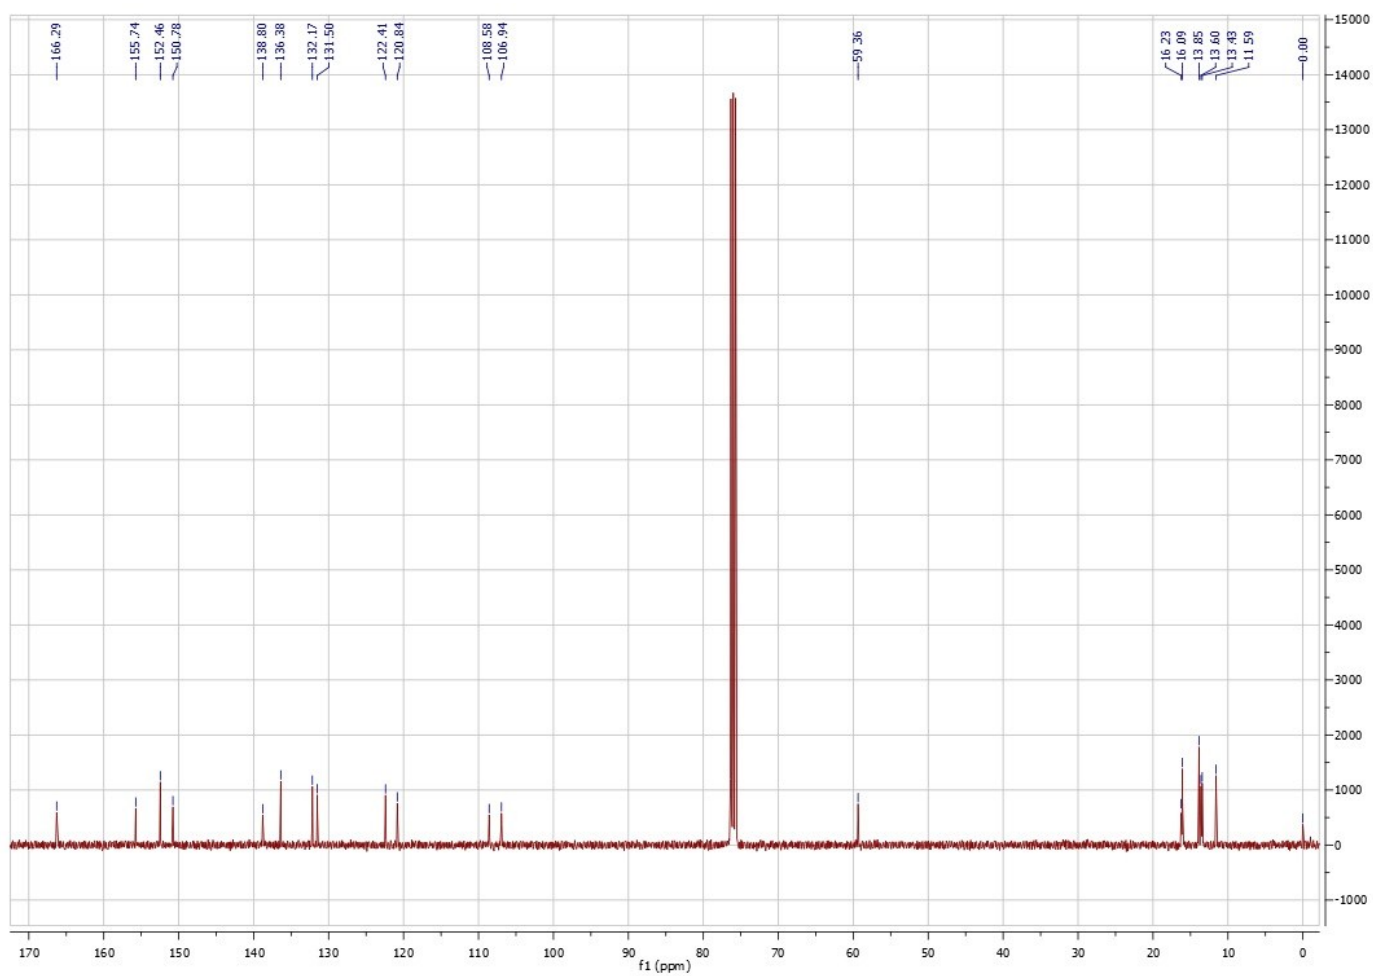

Figure S-6.  $^{13}\text{C}$ -NMR of compound 2a in  $\text{CDCl}_3$ .

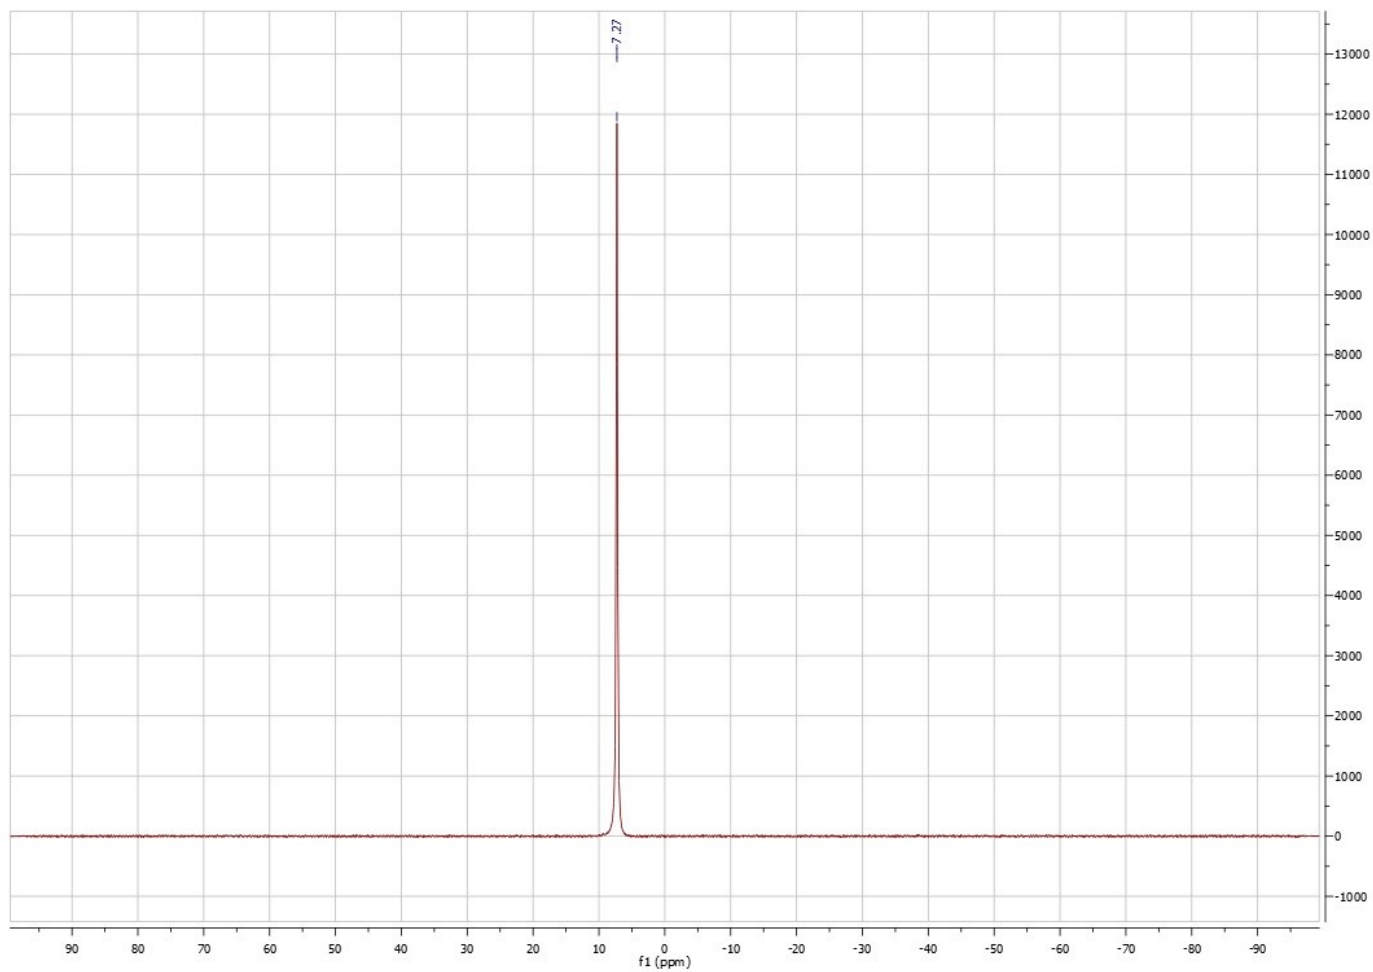

Figure S-7.  $^{11}\text{B}$ -NMR of compound 2a in  $\text{CDCl}_3$ .

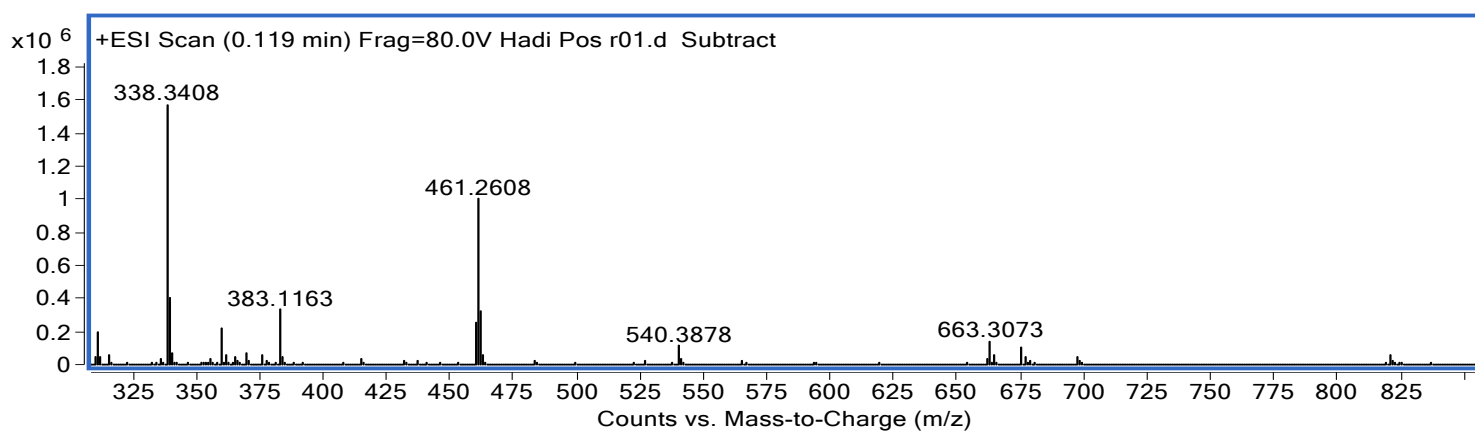

Figure S-8. HRMS spectrum of compound 2a

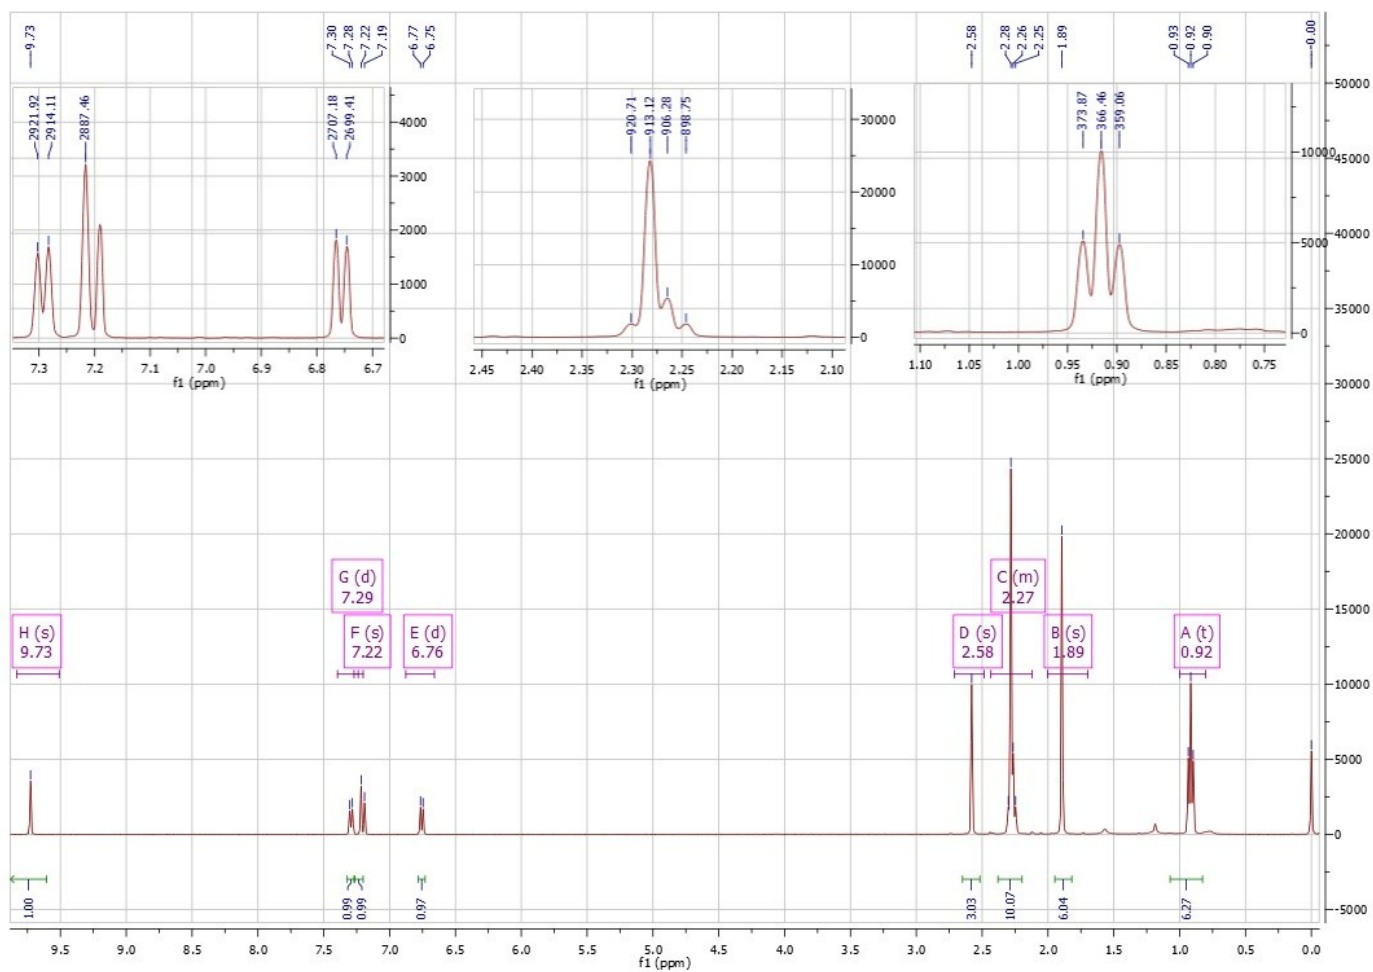

Figure S-9.  $^1\text{H-NMR}$  of compound 2b in  $\text{CDCl}_3$ .



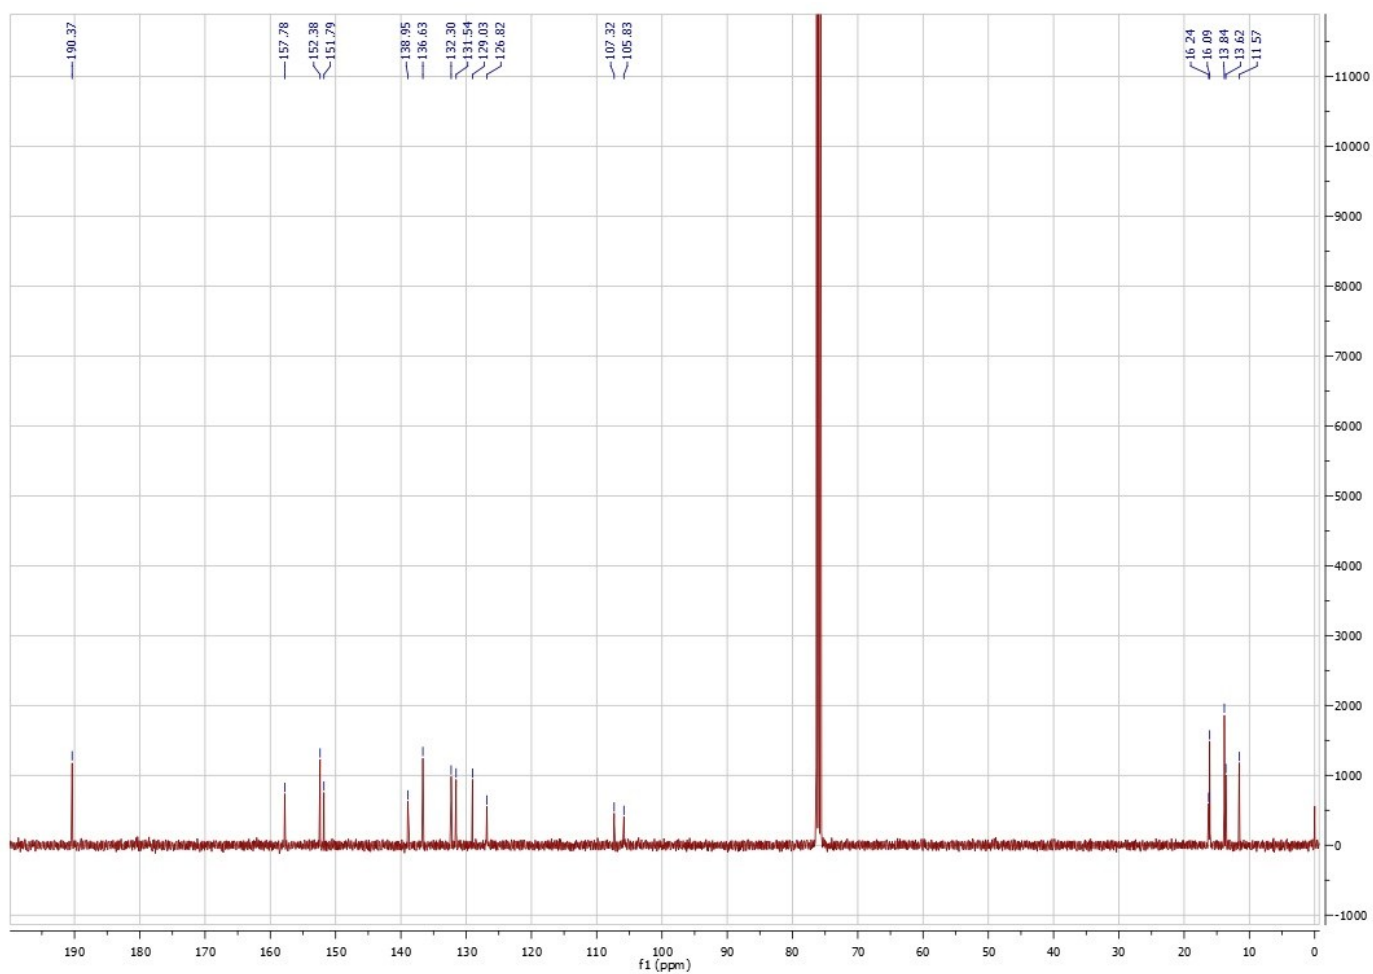

Figure S-10.  $^{13}\text{C}$ -NMR of 2b in  $\text{CDCl}_3$ .

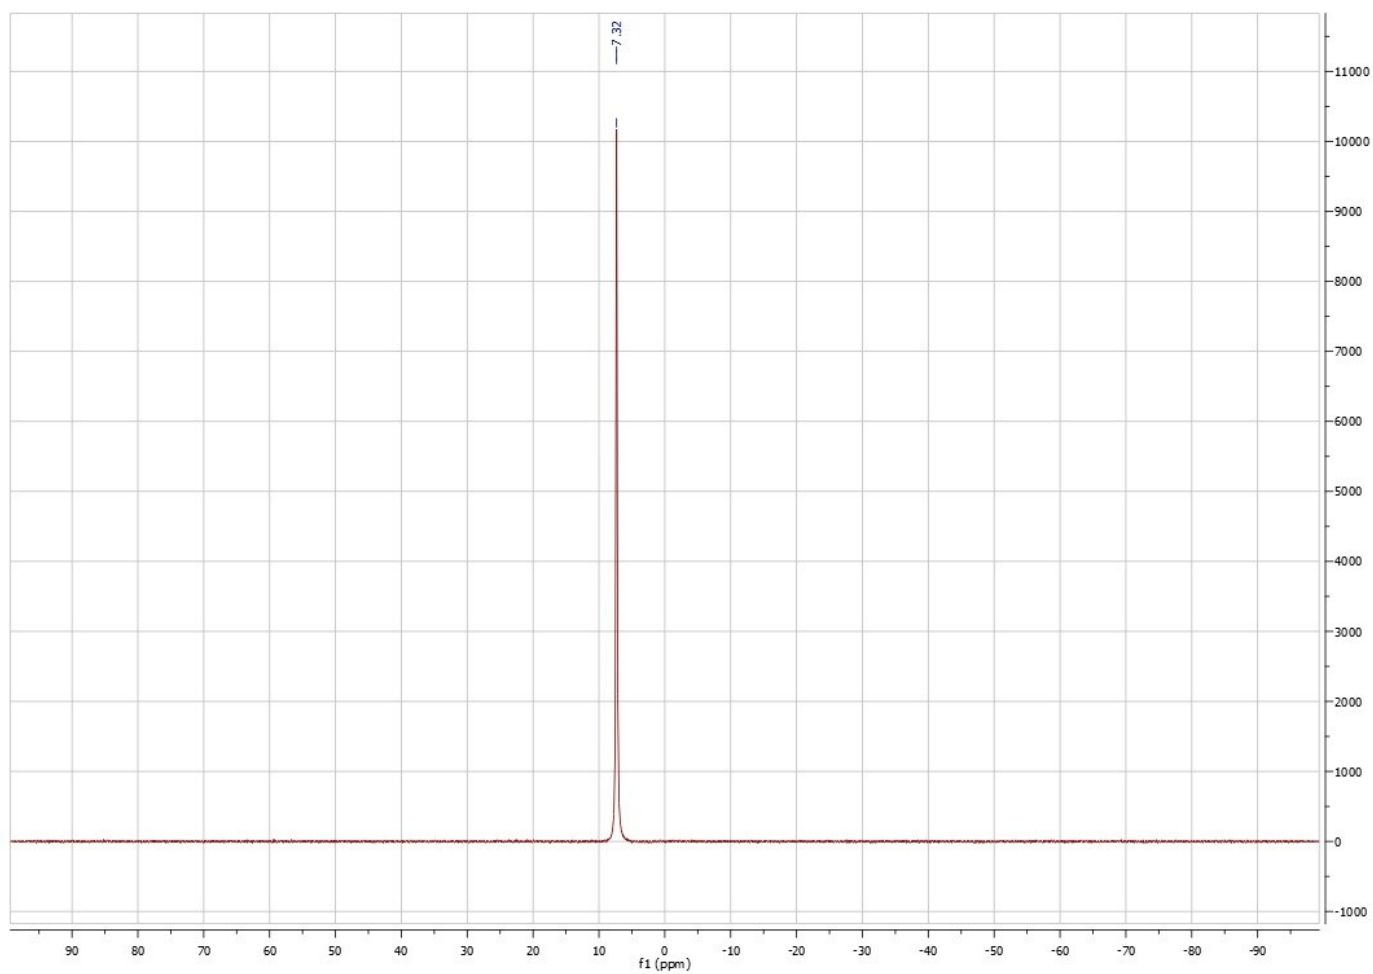

Figure S-11  $^{11}\text{B}$ -NMR of 2b in  $\text{CDCl}_3$ .

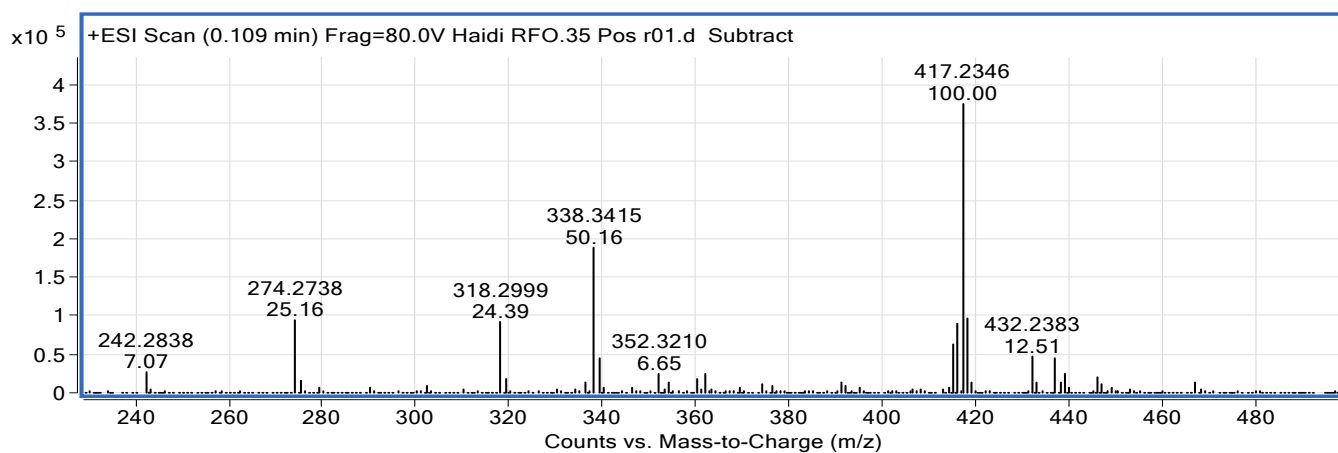

Figure S-12 HRMS spectrum of 2b.

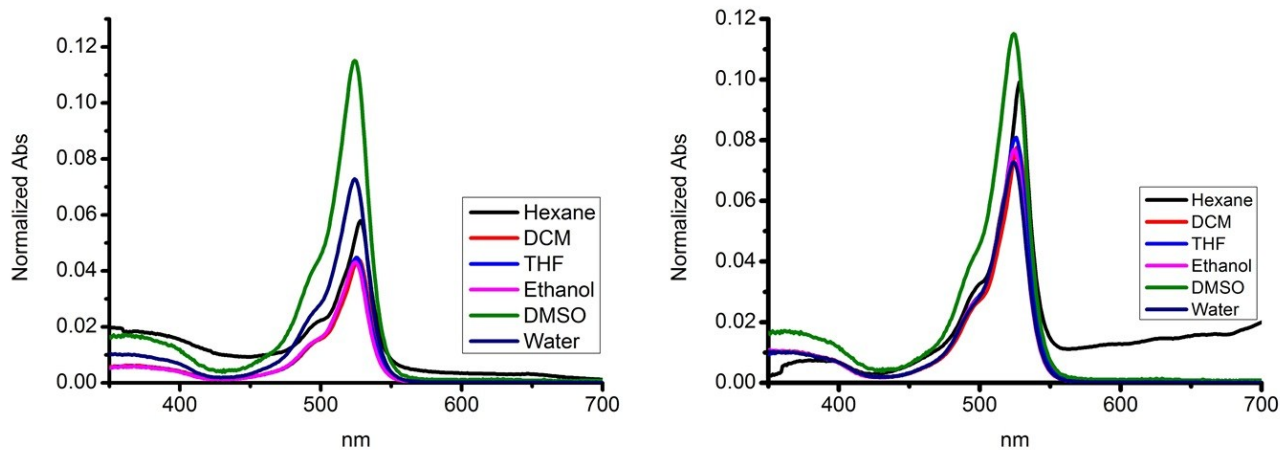

Figure S-13. Normalized absorption spectra of 10  $\mu\text{M}$  in different solvents (Left) 2a, (Right) 2b.

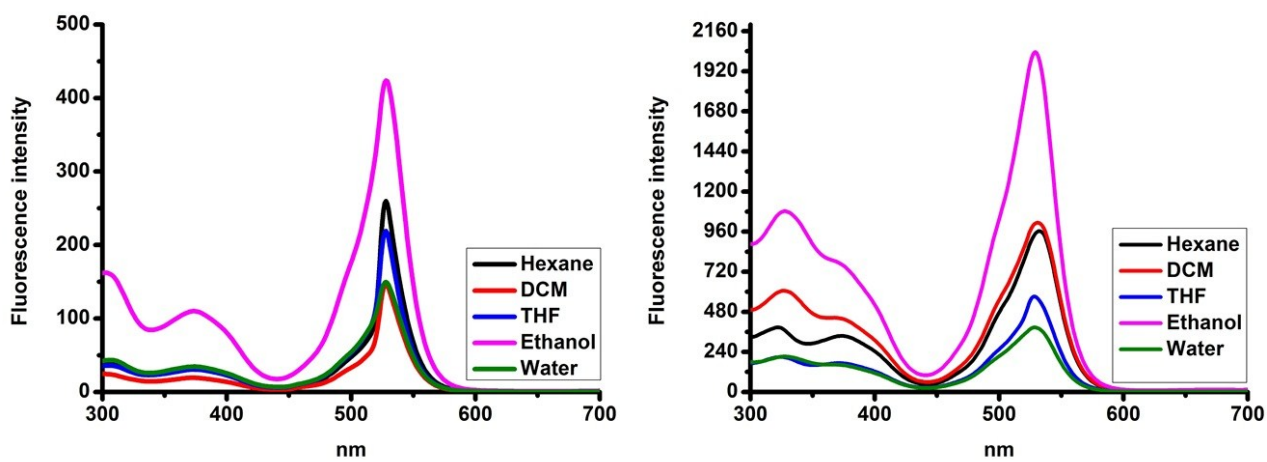

Figure S-14. Excitation spectra of 10  $\mu\text{M}$  in different solvents, slit width 5nm, PMT voltage 700, (Left) 2a, (Right) 2b.

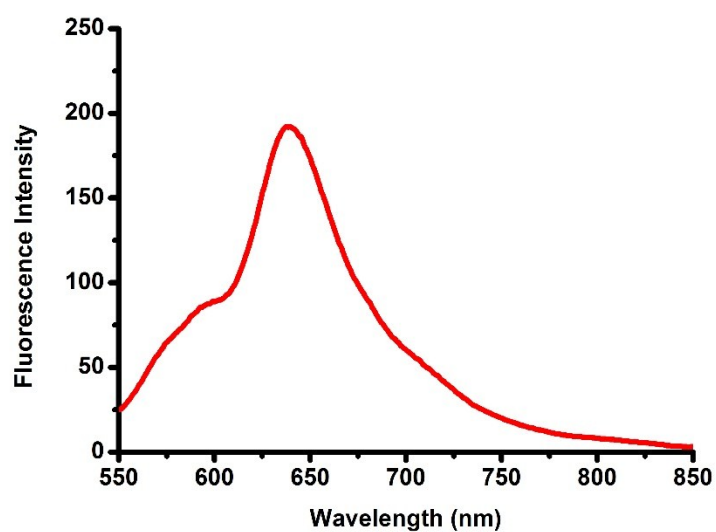

Figure S-15. Solid state fluorescence spectrum of F-Bodipy , slit width 5nm, PMT voltage 700.

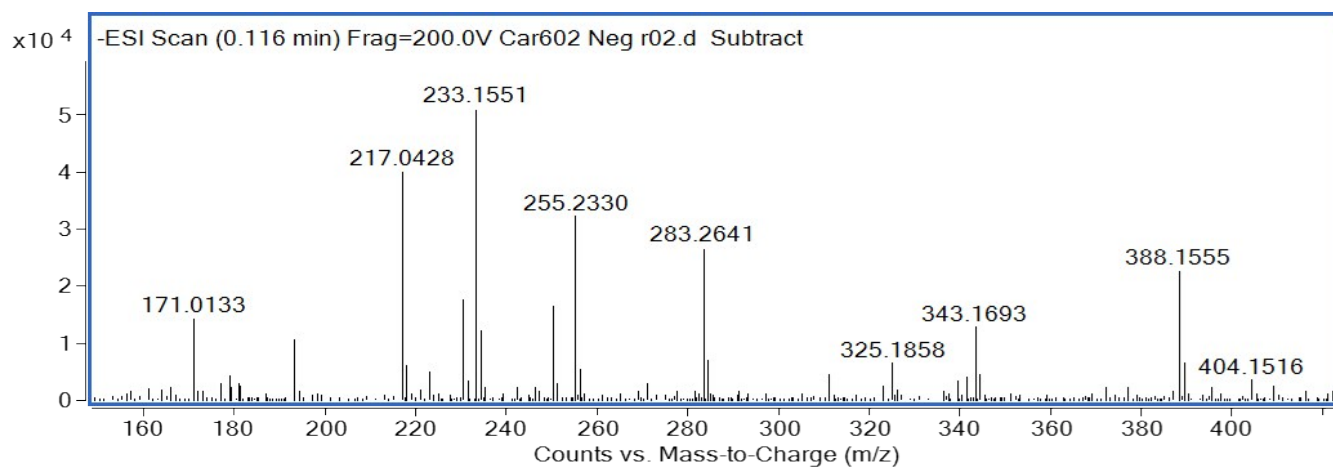

Figure S-16. HRMS spectrum for reaction mixture of 2a 10  $\mu$ M and PLE enzyme 1 U/ml in phosphate buffer solution 100mM pH 7.4.

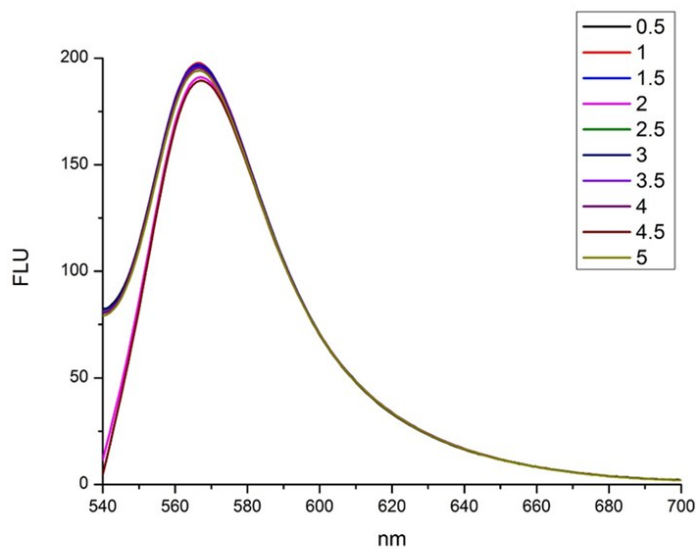

Figure S-17. emission spectra changing with time for probe 10  $\mu\text{M}$  and PLE enzyme 1 U/ml in phosphate buffer solution 100mM pH 7.4 , 510 nm has been used for excitation.

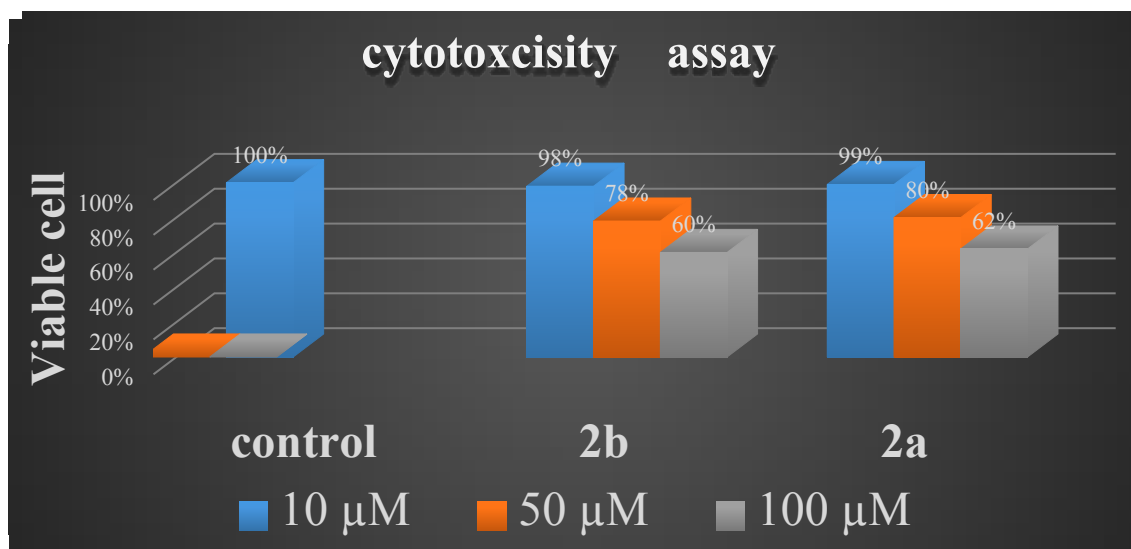

Figure S-18. MTT assay for 2a and 2b with concentrations 10  $\mu\text{M}$  , 50  $\mu\text{M}$  and 100  $\mu\text{M}$  in HeLa cell after incubation for 24h.

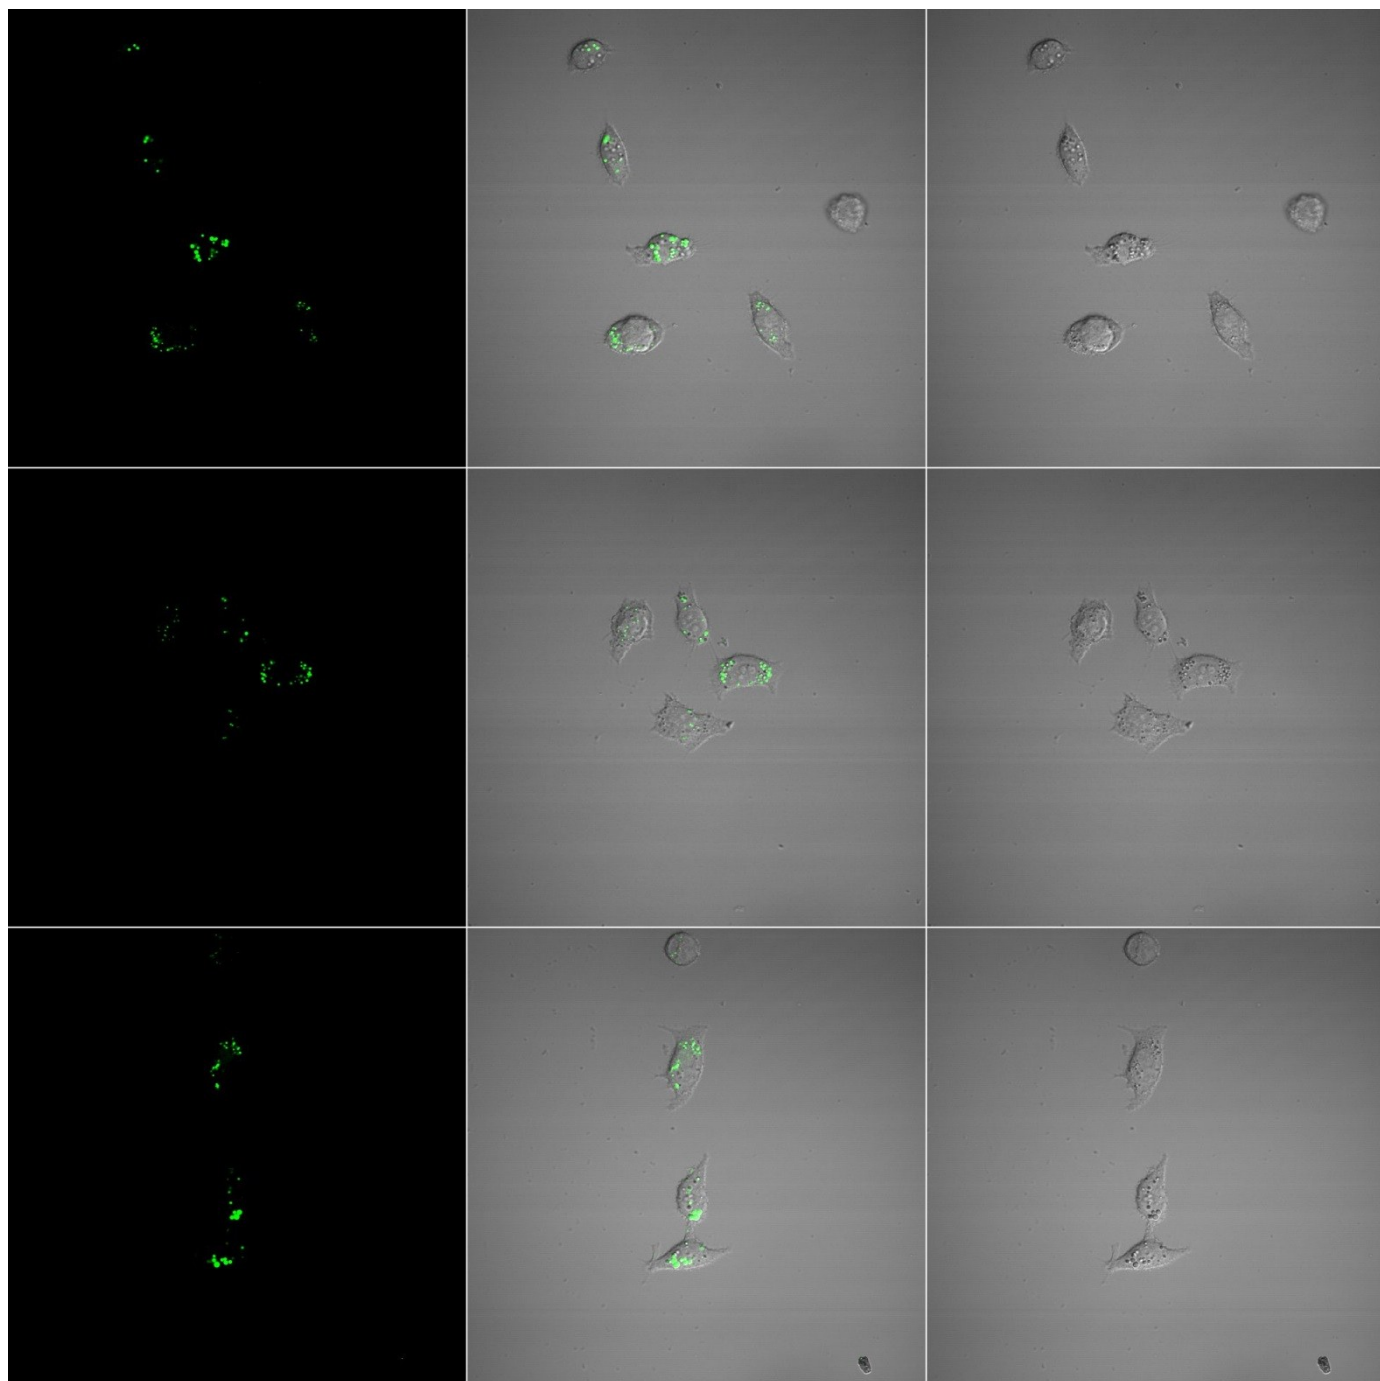

Figure S-19. Different images taken by fluorescent microscope after stunning HeLa cells with 1 nM of compound 2a for 20 mins (Left) green channel, (middle) overlay and (Right) Bright field

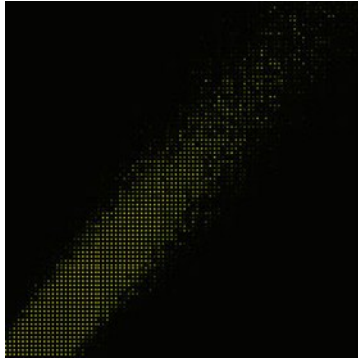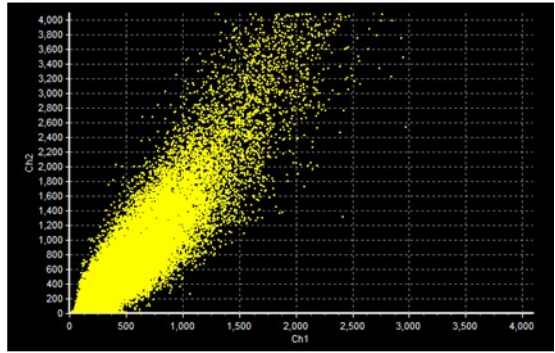

Figure S-20. Left) scatter plot of 2a by using the software Imagej, Right) scatter plot of 2b.

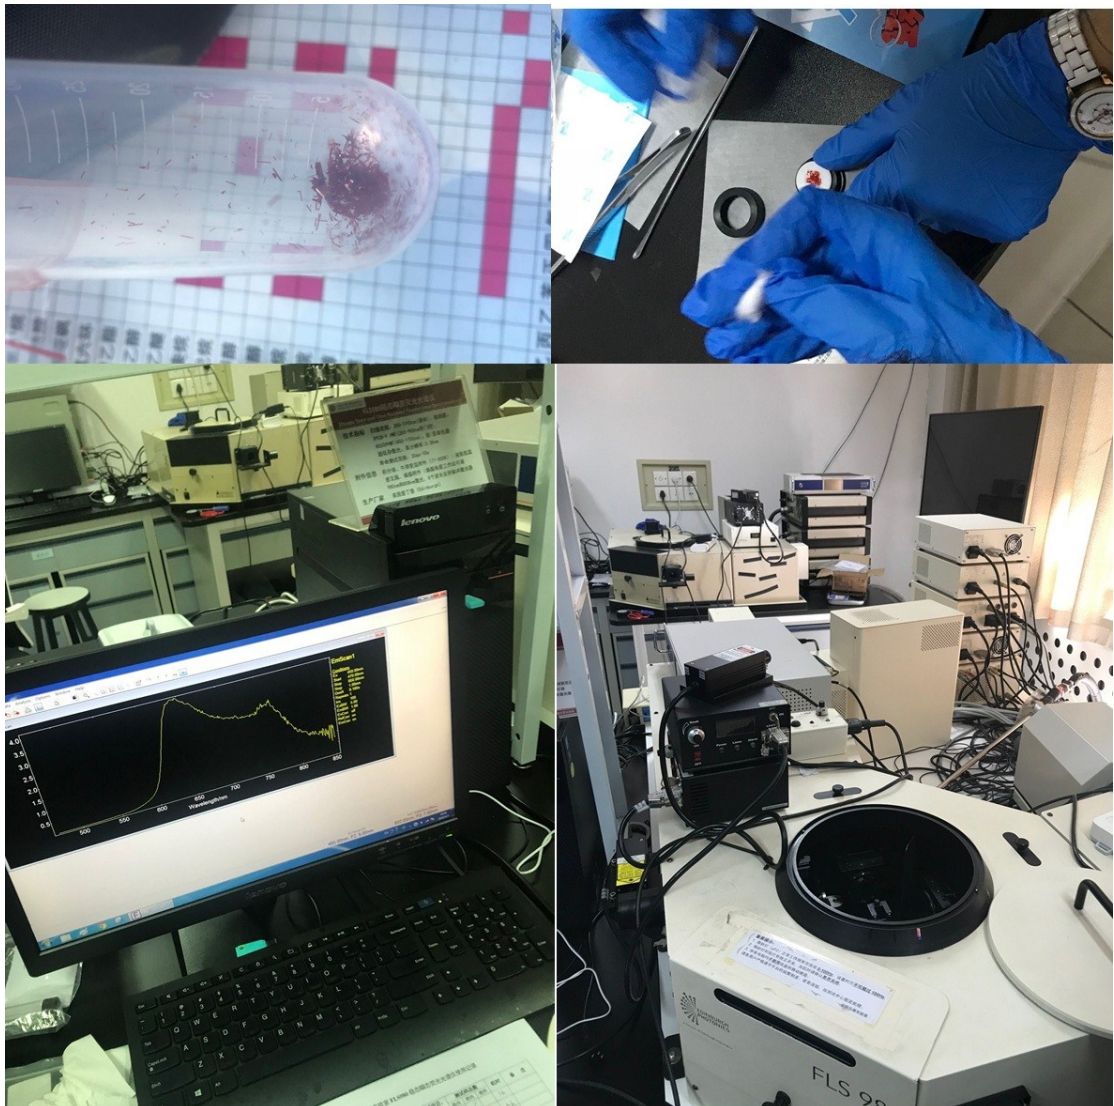

Figure S-21. Different pictures illustrate the process of measuring solid-state fluorescence spectra.
